# Supplementary material for: Theoretical investigation of the reaction mechanisms and kinetics of CFCl2CH2O2 and ClO in the atmosphere
Source: Royal Society of Chemistry journal article supplement (doi:10.1039/d0ra04707d), 2020-01-01
Supplement: d0ra04707d1.pdf [file d0ra04707d1.pdf]

# Theoretical Investigations on the Mechanisms and Kinetics of CFCl<sub>2</sub>CH<sub>2</sub>O<sub>2</sub> with ClO Reaction in the Atmosphere

Yunju Zhang,<sup>1\*</sup> Bing He<sup>2</sup>

<sup>1</sup>*Key Laboratory of Photoinduced Functional Materials, Mianyang Normal University,*

*Mianyang 621000, PR China*

<sup>2</sup>*College of Chemistry and Life Science, Institute of functional molecules, Chengdu*

*Normal University, Chengdu, Sichuan 611130, PR China*

---

<sup>1</sup> Corresponding author. Email address: [zhangyj010@nenu.edu.cn](mailto:zhangyj010@nenu.edu.cn) Tel.: +86 816 2200064; Fax: +86 816 2200819

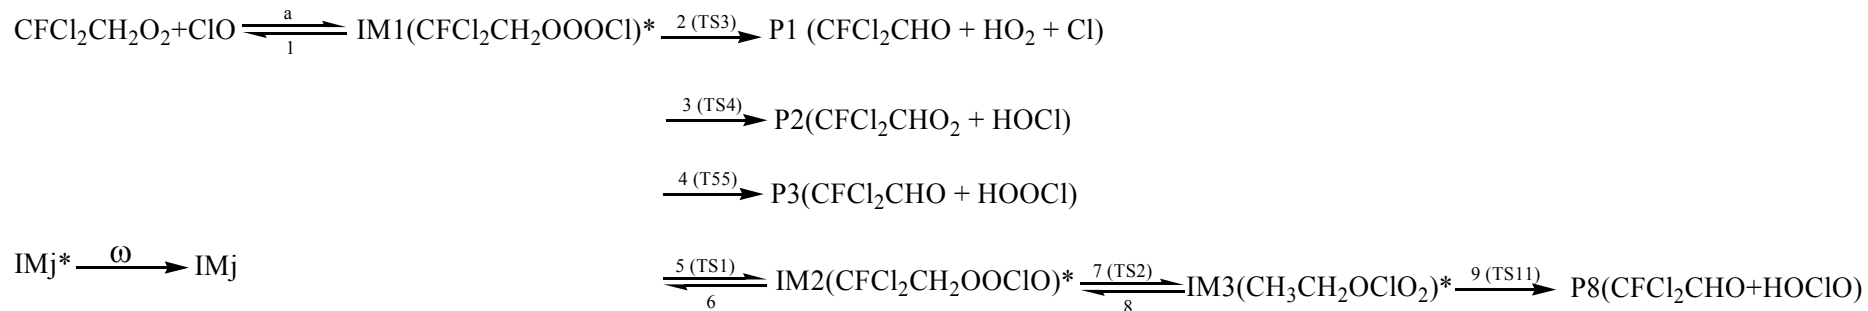

Steady-state assumption for all the excited (IMj) generates to the following expressions: for the second-order rate constants of diverse product pathways:

$$k_{\text{IM1}}(T, P) = \frac{\alpha_a}{h} \frac{Q_t^* Q_r^*}{Q_{\text{CFCl}_2\text{CH}_2\text{O}_2} Q_{\text{ClO}}} e^{-E_a/RT} \times \int_0^\infty \frac{\omega}{X_3} N_a(E^\ddagger) e^{-E^\ddagger/RT} dE^\ddagger \quad (1)$$

$$k_{\text{IM2}}(T, P) = \frac{\alpha_a}{h} \frac{Q_t^* Q_r^*}{Q_{\text{CFCl}_2\text{CH}_2\text{O}_2} Q_{\text{ClO}}} e^{-E_a/RT} \times \int_0^\infty \frac{\omega X_2}{X_3} N_a(E^\ddagger) e^{-E^\ddagger/RT} dE^\ddagger \quad (2)$$

$$k_{\text{IM3}}(T, P) = \frac{\alpha_a}{h} \frac{Q_t^* Q_r^*}{Q_{\text{CFCl}_2\text{CH}_2\text{O}_2} Q_{\text{ClO}}} e^{-E_a/RT} \times \int_0^\infty \frac{\omega X_1 X_2}{X_3} N_a(E^\ddagger) e^{-E^\ddagger/RT} dE^\ddagger \quad (3)$$

$$k_{\text{P1}}(T, P) = \frac{\alpha_a}{h} \frac{Q_t^* Q_r^*}{Q_{\text{CFCl}_2\text{CH}_2\text{O}_2} Q_{\text{ClO}}} e^{-E_a/RT} \times \int_0^\infty \frac{k_2(E)}{X_3} N_a(E^\ddagger) e^{-E^\ddagger/RT} dE^\ddagger \quad (4)$$

$$k_{p2}(T, P) = \frac{\alpha_a}{h} \frac{Q_t^\ddagger Q_r^\ddagger}{Q_{\text{CFCl}_2\text{CH}_2\text{O}_2} Q_{\text{ClO}}} e^{-E_a/RT} \times \int_0^\infty \frac{k_3(E)}{X_3} N_a(E^\ddagger) e^{-E^\ddagger/RT} dE^\ddagger \quad (5)$$

$$k_{p3}(T, P) = \frac{\alpha_a}{h} \frac{Q_t^\ddagger Q_r^\ddagger}{Q_{\text{CFCl}_2\text{CH}_2\text{O}_2} Q_{\text{ClO}}} e^{-E_a/RT} \times \int_0^\infty \frac{k_4(E)}{X_3} N_a(E^\ddagger) e^{-E^\ddagger/RT} dE^\ddagger \quad (6)$$

$$k_{p8}(T, P) = \frac{\alpha_a}{h} \frac{Q_t^\ddagger Q_r^\ddagger}{Q_{\text{CFCl}_2\text{CH}_2\text{O}_2} Q_{\text{ClO}}} e^{-E_a/RT} \times \int_0^\infty \frac{k_9(E) X_1 X_2}{X_3} N_a(E^\ddagger) e^{-E^\ddagger/RT} dE^\ddagger \quad (7)$$

With the following definition:

$$X_1 = k_7(E) / (k_8(E) + k_9(E) + \omega)$$

$$X_2 = k_5(E) / (k_6(E) + k_7(E) - k_8(E) * X_1 + \omega)$$

$$X_3 = k_1(E) + k_2(E) + k_4(E) + k_5(E) + k_6(E) - k_6(E) * X_2 + \omega$$

The microcanonical rate constant is calculated using the RRKM theory as follows:

$$k_i(E) = \alpha_i C_i N_i(E_i^\ddagger) / h \rho_j(E_j) \quad (8)$$

In the above equations,  $\alpha_a$  is the statistical factor for the reaction path a, and  $\alpha_i$  is the statistical factor (degeneracy) for the  $i$ th reaction path;  $E_a$  is the energy barrier for the reaction step a.  $Q_{\text{ClO}}$  and  $Q_{\text{CFCl}_2\text{CH}_2\text{O}_2}$  are the total partition function of ClO and  $\text{CFCl}_2\text{CH}_2\text{O}_2$ , respectively;  $Q_t^\ddagger$  and  $Q_r^\ddagger$  are the translational and rotational partition functions of entrance transition state, respectively;  $N_a(E^\ddagger)$  is the number of state for the association transition state with excess energy  $E^\ddagger$  above the association barrier.  $k_i(E)$  is the energy-specific rate constant for the  $i$ th channel and  $C_i$  is the ratio of the overall rotational partition function of the  $\text{TS}_i$  and  $\text{IM}_j$ ;  $N_i(E_i^\ddagger)$  is the number of states at the energy above the barrier height for transition state  $i$ ;  $\rho_j(E_j)$  is the density of states at energy  $E_j$  of the intermediate. The density of states and the number of states are calculated using the extended Beyer-Swinehart algorithm.

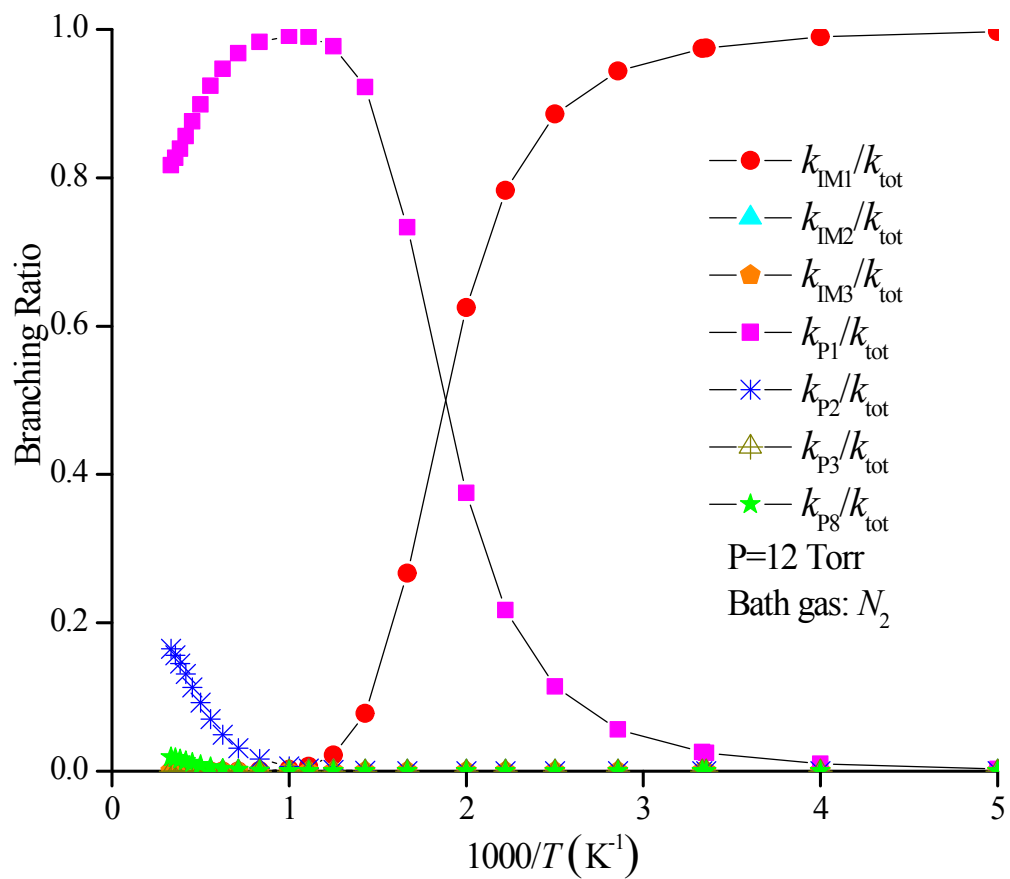

**Fig. S1** Branching ratios for the primary channels of the  $CFCl_2CH_2O_2$  with ClO reaction

**Table S1.** The harmonic vibrational frequencies (imaginary frequency is suffixed with *i*) and the moment of inertia ( $I_a$ ,  $I_b$  and  $I_c$ ) of all the intermediates and transition states in the  $\text{CFCl}_2\text{CH}_2\text{O}_2$  with ClO reaction.

| Species | Frequencies ( $\text{cm}^{-1}$ )                                                                                                                      | $I_a, I_b, I_c$ (amu bohr <sup>2</sup> ) |
|---------|-------------------------------------------------------------------------------------------------------------------------------------------------------|------------------------------------------|
| IM1     | 28, 36, 80, 115, 187, 247, 274, 320, 350, 378, 437, 443, 529, 549, 633, 687, 828, 916, 964, 1012, 1096, 1151, 1305, 1383, 1435, 3064, 3135            | 1002.01726, 4076.24843, 4381.72299       |
| IM2     | 30, 47, 69, 84, 155, 208, 224, 288, 321, 358, 389, 434, 451, 538, 632, 829, 863, 898, 927, 999, 1086, 1157, 1306, 1386, 1446, 3091, 3158              | 960.02897, 3995.26441, 4491.04629        |
| IM3     | 38, 51, 63, 173, 201, 225, 283, 341, 373, 398, 425, 438, 475, 499, 639, 831, 912, 957, 1048, 1057, 1103, 1126, 1282, 1387, 1439, 2986, 3072           | 944.51015, 3284.42056, 3757.90595        |
| TS1     | 141 <i>i</i> , 24, 38, 90, 106, 193, 205, 261, 327, 345, 391, 445, 493, 545, 639, 821, 844, 904, 962, 1038, 1104, 1156, 1298, 1373, 1448, 3090, 3163, | 935.51147, 4610.29758, 4904.84044        |
| TS2     | 152 <i>i</i> , 30, 40, 63, 121, 184, 241, 259, 337, 372, 396, 407, 444, 462, 632, 826, 867, 880, 986, 1046, 1114, 1124, 1230, 1335, 1367, 2903, 2946  | 849.41774, 4541.65155, 4907.80989        |
| TS3     | 885 <i>i</i> , 31, 65, 91, 110, 203, 243, 277, 312, 362, 381, 409, 470, 510, 584, 641, 727, 856, 948, 1044, 1111, 1163, 1320, 1372, 1484, 1607, 2945  | 1305.16877, 3228.43545, 3697.18660       |
| TS4     | 472 <i>i</i> , 33, 58, 81, 107, 162, 185, 236, 305, 324, 353, 393, 453, 522, 652, 736, 822, 912, 945, 1038, 1137, 1189, 1200, 1353, 1433, 1977, 3091, | 1228.50525, 3589.04146, 4240.21577       |
| TS5     | 380 <i>i</i> , 37, 54, 90, 97, 183, 214, 269, 325, 346, 390, 411, 456, 568, 604, 667, 744, 822, 923, 1042, 1122, 1195, 1249, 1280, 1398, 1884, 2937   | 901.43903, 5083.31695, 5492.25288        |
| TS6     | 386 <i>i</i> , 39, 60, 89, 111, 149, 170, 249, 275, 306, 360, 373, 415, 430, 496, 607, 670, 693, 745, 936, 1029, 1117, 1218, 1333, 1449, 3175, 3300   | 1225.82115, 3321.16860, 3724.92613       |
| TS7     | 439 <i>i</i> , 25, 37, 82, 120, 157, 197, 232, 247, 365, 320, 407, 415, 437, 611, 680,                                                                | 1260.55647, 3092.16011, 3453.36207       |

|         |                                                                                                                                                         |                                    |
|---------|---------------------------------------------------------------------------------------------------------------------------------------------------------|------------------------------------|
|         | 699, 733, 920, 975, 1047, 1116, 1126, 1225, 1448, 3213, 3336                                                                                            |                                    |
| TS8     | 661 <i>i</i> , 26, 37, 73, 91, 98,134, 173, 193, 213, 318, 325, 418, 445, 464, 590, 656, 924, 1013, 1100, 1155, 1205, 1258, 1334,1449, 2194, 2926       | 1203.70121, 3379.81358, 3463.43762 |
| TS9     | 699 <i>i</i> , 39, 50, 82, 102, 123, 153, 206, 238, 294, 303, 317, 372, 442, 467, 491, 656, 933, 961, 1007, 1127, 1134, 1193, 1334, 1451, 2220, 2930    | 1177.31445, 3278.69720, 3343.20452 |
| TS10    | 445 <i>i</i> , 35, 63, 94, 139, 164, 183, 261, 279, 351, 383, 384, 412, 440, 500, 614, 729, 739, 843, 973, 1103,1139, 1215, 1408, 1463, 3145, 3273      | 1136.20970, 3495.66998, 3526.33692 |
| TS11    | 611 <i>i</i> , 50, 68, 91, 160, 214, 224, 302, 353, 394, 399, 436, 460, 539, 677, 742, 830, 908, 959, 1023, 1108, 1141, 1265, 1290, 1398, 1812, 2984    | 956.18100, 3478.82167, 3953.78449  |
| TS12    | 487 <i>i</i> , 15, 37, 69, 86, 93, 127, 145, 192, 226, 300, 309, 410, 419, 437, 590, 658, 671, 964, 1021, 1156, 1218, 1257, 1330, 1442, 2284, 2914      | 1123.76172, 3590.36624, 3824.40193 |
| TS13    | 1094 <i>i</i> , 37, 61, 100, 120, 152, 178, 201, 224, 247, 304, 310, 381, 452, 454, 512, 645, 888, 904, 1003, 1065, 1068, 1150, 1336, 1575, 1709, 3061, | 1074.89180, 3218.51627, 3347.15574 |
| TS14    | 664 <i>i</i> , 47, 58, 95, 112, 173, 190, 191, 243, 268, 342, 353, 405, 428, 525, 611, 716, 729, 974, 1049, 1079, 1107, 1140, 1362, 1392, 3119, 3265    | 1342.46607, 2883.77065, 3136.09582 |
| TS15    | 480 <i>i</i> , 21, 55, 64, 85, 121, 142, 167, 204, 255, 293, 377, 389, 435, 447, 622, 711, 780, 953, 981, 1039, 1075, 1110, 1414, 1422, 3167, 3311      | 1685.09030, 2871.65694, 3427.51718 |
| T-h-TS1 | 1512 <i>i</i> , 29, 45, 57, 75, 123, 153, 186, 267, 288, 328, 382, 416, 473, 566, 692, 736, 815, 906, 965, 1040, 1114, 1134, 1172, 1311, 1428, 3154     | 1258.98887, 3268.90649, 4054.33168 |
| T-TS1   | 660 <i>i</i> , 14, 27, 48, 85, 109, 142, 164, 214, 249, 338, 357, 378, 405, 460, 604, 704, 729, 929, 1008, 1038, 1073, 1129, 1390, 1417, 3194, 3331     | 1712.44558, 3034.30666, 3570.20440 |
| T-TS2   | 803 <i>i</i> , 29, 46, 58, 96, 120, 176, 224, 254, 311, 350, 362, 408, 449, 505, 622, 771, 822, 906, 1000, 1077, 1138, 1265, 1362, 1407, 2991, 3080     | 925.37030, 4014.72610, 4336.90745  |
| T-TS3   | 668 <i>i</i> , 29, 34, 66, 101, 137, 179, 214, 257, 298, 343, 366, 401, 413, 457, 629, 752, 827, 905, 996, 1053, 1147, 1290, 1374, 1428, 3069, 3141     | 1284.55118, 3215.74040, 3595.43585 |
